# Supplementary material for: A quinazolin-based Schiff-base chemosensor for colorimetric detection of Ni2+ and Zn2+ ions and ‘turn-on’ fluorometric detection of Zn2+ ion
Source: Royal Society of Chemistry journal article supplement (doi:10.1039/d2ra05564c), 2022-01-01
Supplement: d2ra05564c1.pdf [file d2ra05564c1.pdf]

## Supporting Information

# A Quinazolin-based Schiff-base chemosensor for colourimetric detection of Ni<sup>2+</sup> and Zn<sup>2+</sup> ions and 'turn-on' fluorometric detection of Zn<sup>2+</sup> ion

Vanshika Sharma, Meman Sahu, Amit Kumar Manna, Dinesh De and  
Goutam Kumar Patra\*

Department of Chemistry, Guru Ghasidas Vishwavidyalaya, Bilaspur (C.G),  
India

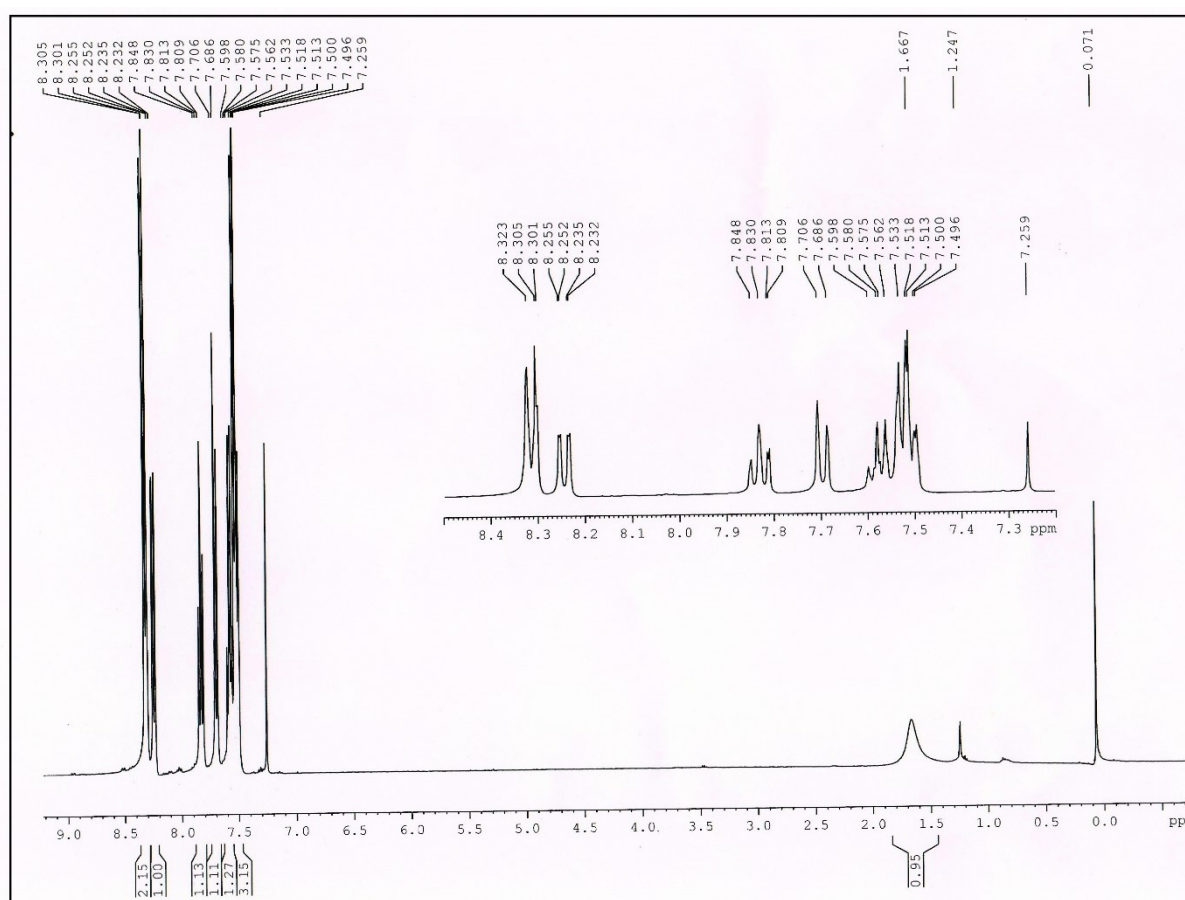

Fig.S1. <sup>1</sup>H NMR spectra of 1 in CDCl<sub>3</sub>.

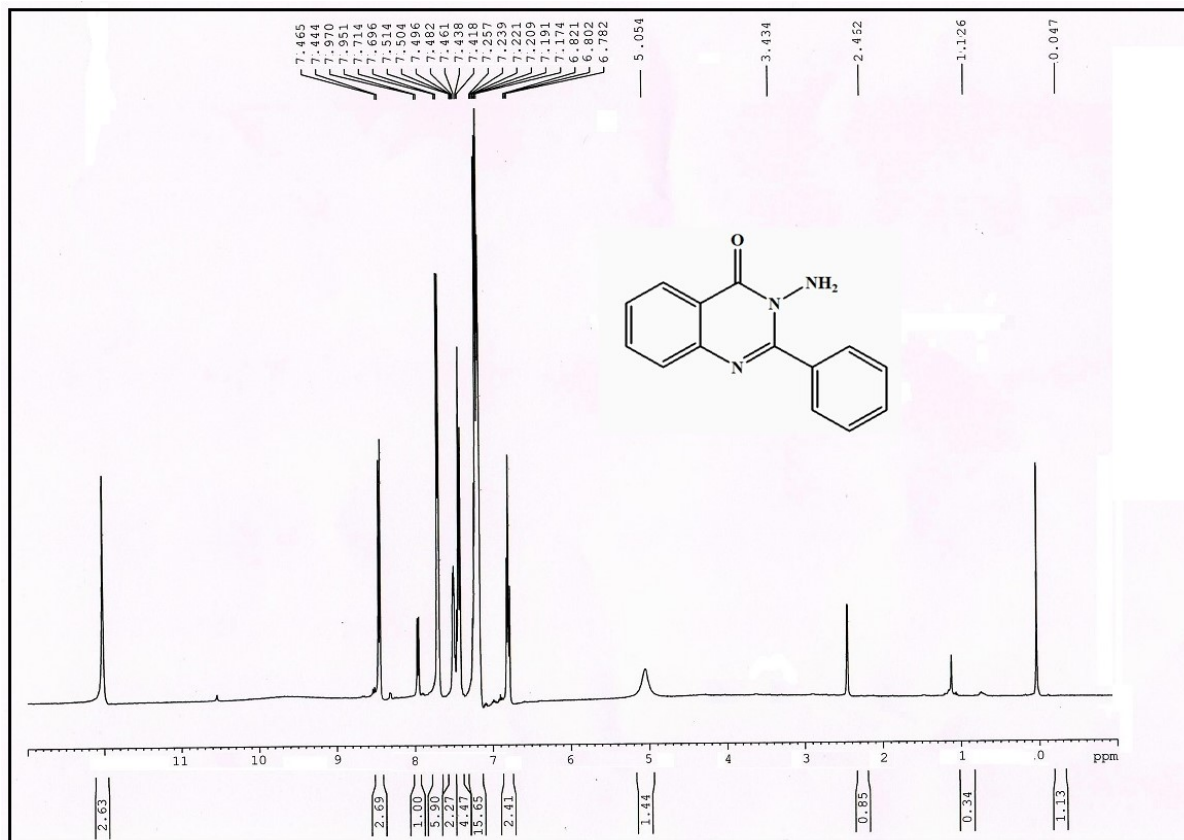

Fig.S2. <sup>1</sup>H NMR spectra of 2 in CDCl<sub>3</sub>.

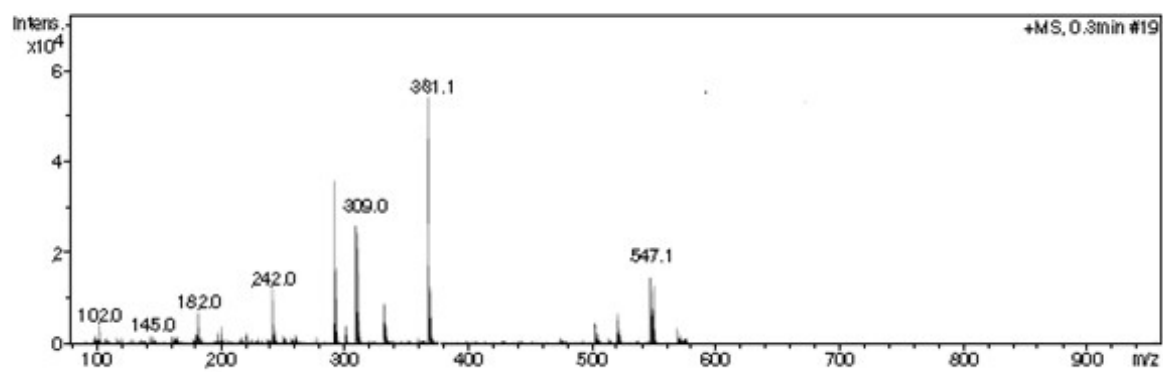

Fig. S3. ESI-mass spectra of L

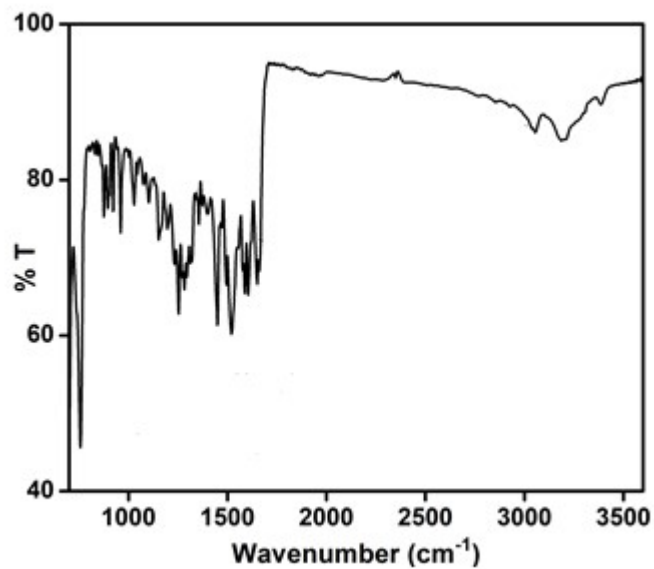

**Fig. S4.** FTIR spectra of **L**

AC-B-PYal-1H-(ND)-400

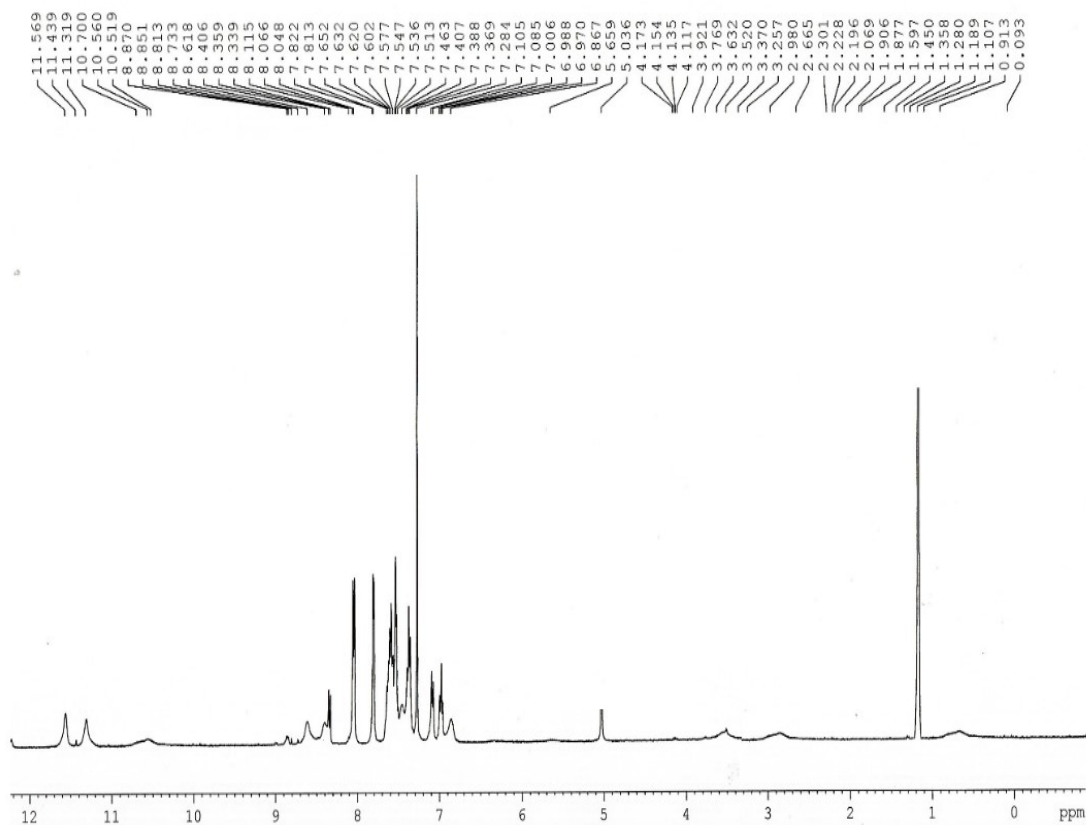

**Fig.S5.**  $^1\text{H}$  NMR spectra of **L** in  $\text{CDCl}_3$

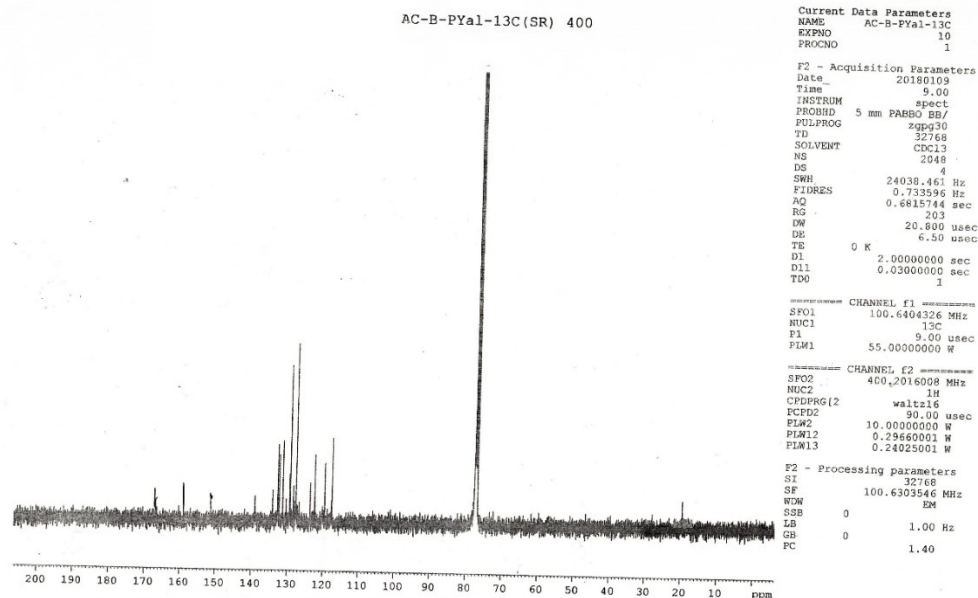

**Fig.S6.**  $^{13}\text{C}$  NMR spectra of **L** in  $\text{CDCl}_3$

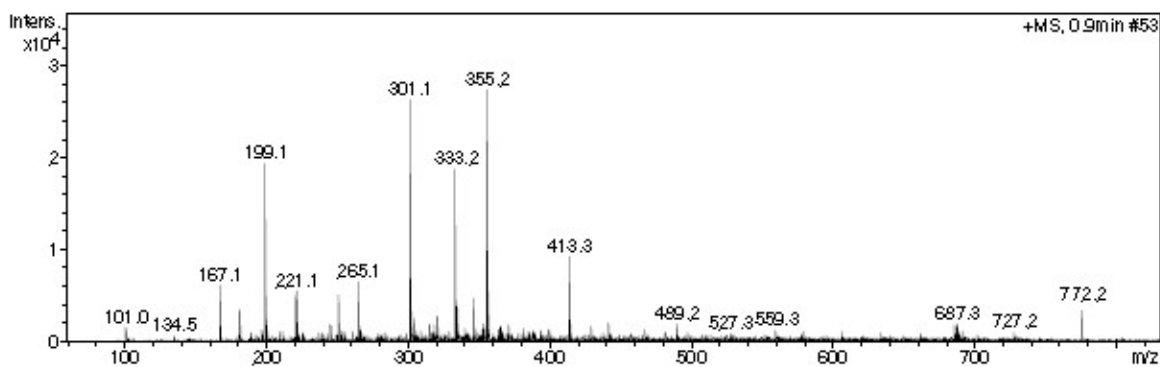

**Fig. S7.** ESI-mass spectra of  $\text{NiL}_2$  (**3**)

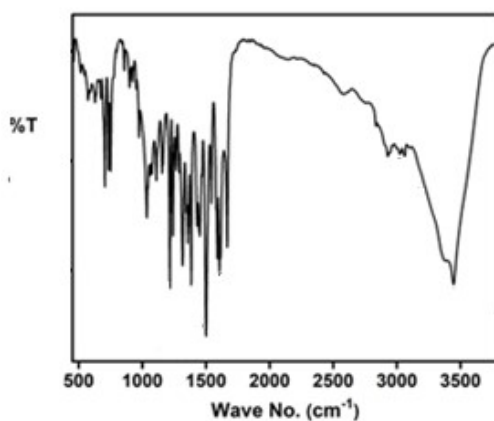

**Fig. S8.** FTIR spectra of  $\text{NiL}_2$  (**3**)

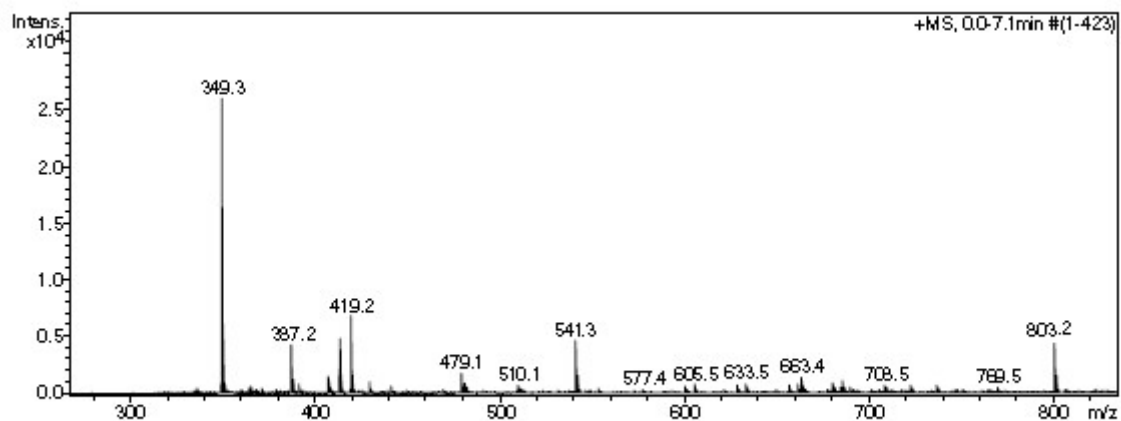

Fig. S9. ESI-mass spectra of ZnL<sub>2</sub> (4)

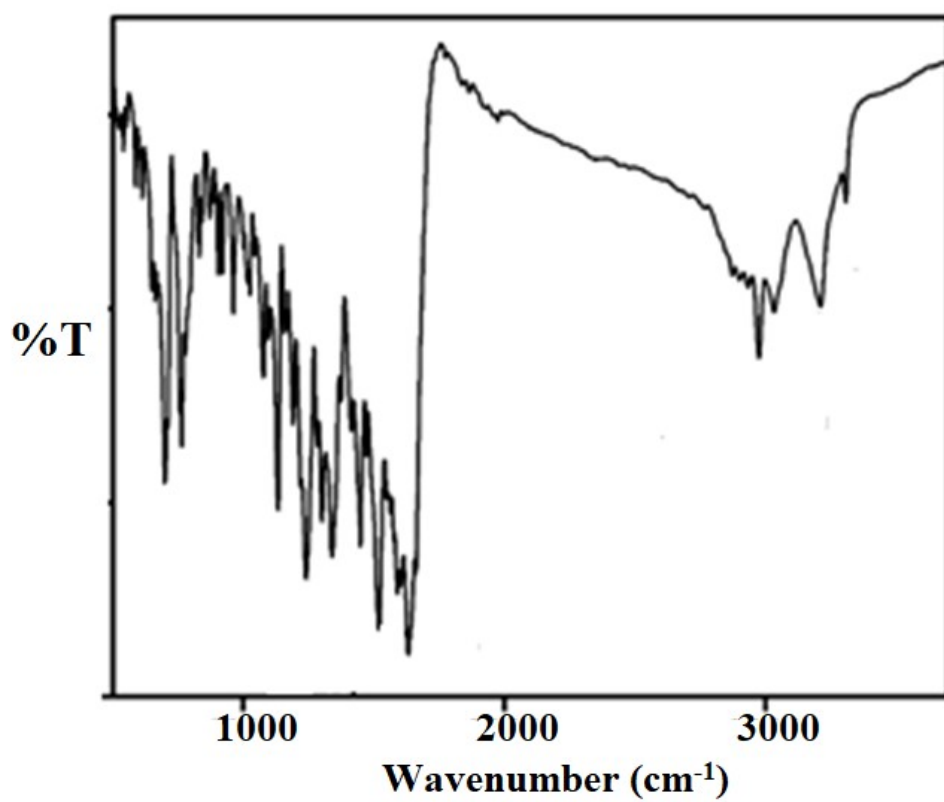

Fig. S10. FTIR spectra of ZnL<sub>2</sub> (4)

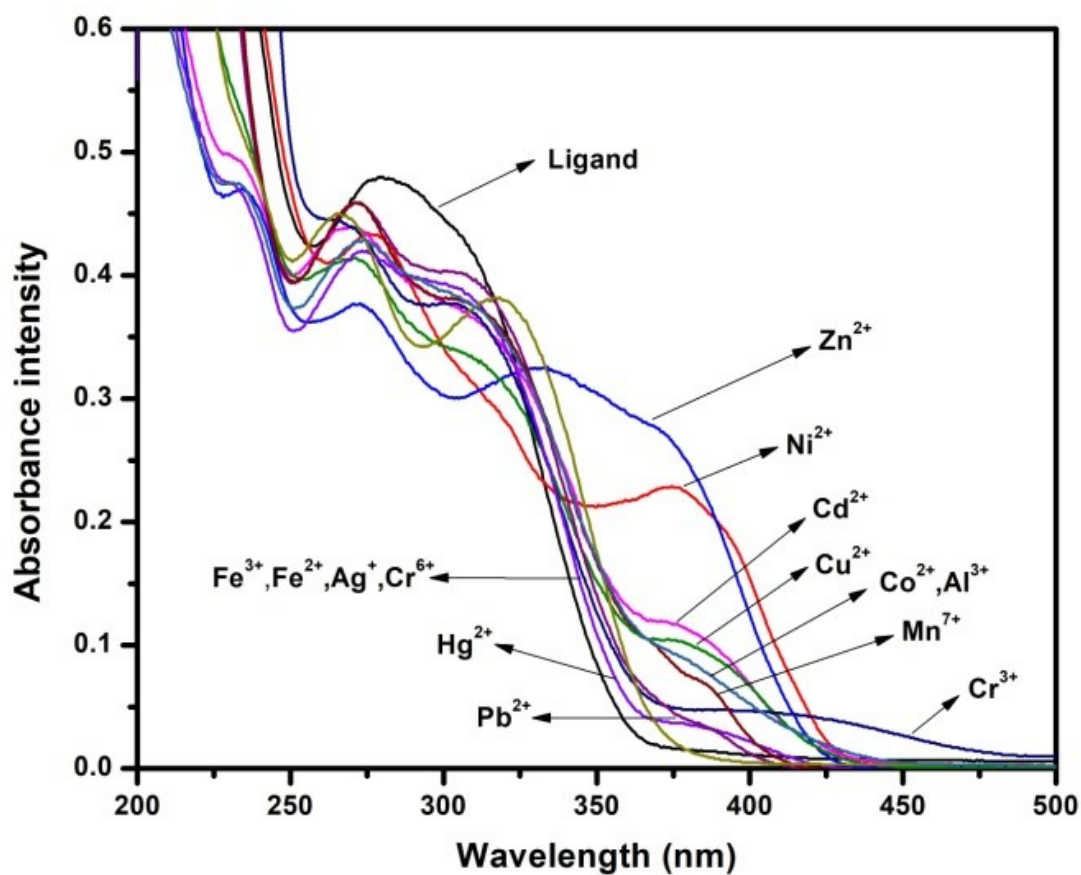

**Fig. S11.** Change in absorption spectra of L (10 μM) in presence of 2 equiv. of different metal ions in methanol-tris-HCl buffer (1:1 v/v, pH 7.2) at room temperature.

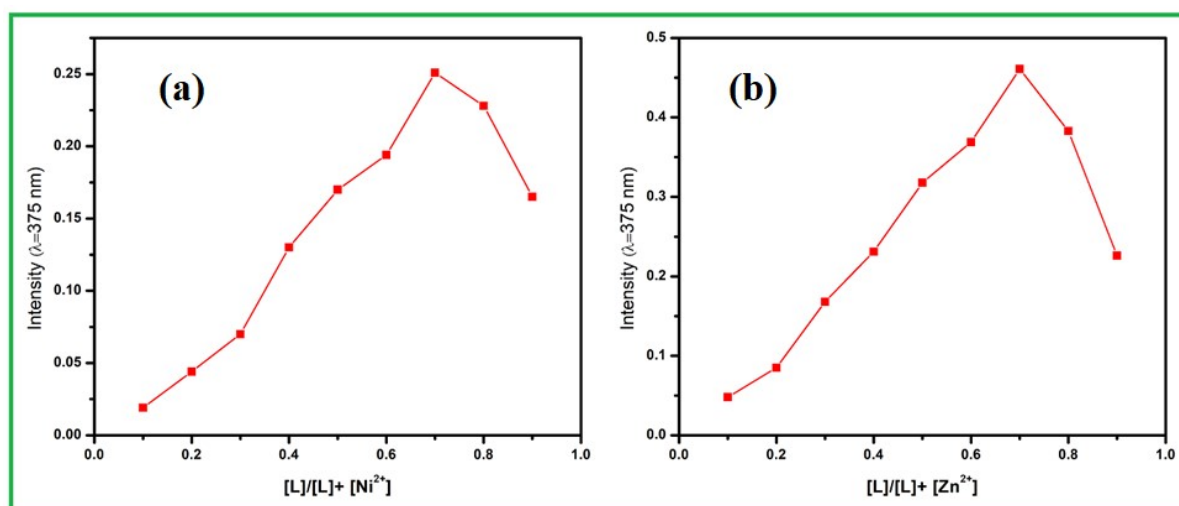

**Fig. S12.** Job's plot for (a) Ni<sup>2+</sup> and (b) Zn<sup>2+</sup>.

**Table S1.** Selected Bond Lengths for **3**

| Atom  | Atom              | Length/Å |
|-------|-------------------|----------|
| Ni(1) | O(2) <sup>1</sup> | 2.053(5) |
| Ni(1) | O(2)              | 2.053(5) |
| Ni(1) | N(1) <sup>1</sup> | 2.112(6) |
| Ni(1) | N(1)              | 2.112(6) |
| Ni(1) | N(2)              | 1.979(5) |
| Ni(1) | N(2) <sup>1</sup> | 1.979(5) |

<sup>1</sup>1-X,+Y,3/2-Z**Table S2.** Selected Bond Angles for **3**

| Atom              | Atom  | Atom              | Angle/°    |
|-------------------|-------|-------------------|------------|
| O(2) <sup>1</sup> | Ni(1) | O(2)              | 89.3(3)    |
| O(2) <sup>1</sup> | Ni(1) | N(1) <sup>1</sup> | 154.73(18) |
| O(2)              | Ni(1) | N(1) <sup>1</sup> | 96.3(2)    |
| O(2)              | Ni(1) | N(1)              | 154.73(18) |
| O(2) <sup>1</sup> | Ni(1) | N(1)              | 96.3(2)    |
| N(1)              | Ni(1) | N(1) <sup>1</sup> | 89.1(3)    |
| N(2) <sup>1</sup> | Ni(1) | O(2) <sup>1</sup> | 75.8(2)    |
| N(2)              | Ni(1) | O(2)              | 75.8(2)    |
| N(2) <sup>1</sup> | Ni(1) | O(2)              | 104.2(2)   |
| N(2)              | Ni(1) | O(2) <sup>1</sup> | 104.2(2)   |
| N(2) <sup>1</sup> | Ni(1) | N(1) <sup>1</sup> | 79.0(2)    |
| N(2)              | Ni(1) | N(1) <sup>1</sup> | 101.1(2)   |
| N(2) <sup>1</sup> | Ni(1) | N(1)              | 101.1(2)   |
| N(2)              | Ni(1) | N(1)              | 79.0(2)    |
| N(2)              | Ni(1) | N(2) <sup>1</sup> | 179.9(4)   |
| C(8)              | O(2)  | Ni(1)             | 111.1(4)   |
| C(5)              | N(1)  | Ni(1)             | 111.6(5)   |
| C(1)              | N(1)  | Ni(1)             | 127.6(5)   |
| N(3)              | N(2)  | Ni(1)             | 120.4(4)   |
| C(6)              | N(2)  | Ni(1)             | 118.1(5)   |

<sup>1</sup>1-X,+Y,3/2-Z
